# Supplementary material for: Low-temperature kinetics for the N + NO reaction: experiment guides the way
Source: Royal Society of Chemistry journal article supplement (doi:10.1039/d3cp00584d), 2023-01-01
Supplement: d3cp00584d1.pdf [file d3cp00584d1.pdf]

Electronic Supplementary Information for

### Low-Temperature Kinetics for the N + NO reaction: Experiment Guides the Way

Kevin M. Hickson,<sup>\*,1</sup> Juan Carlos san Vicente Veliz,<sup>2</sup> Debasish Koner<sup>2,3</sup> and Markus Meuwly<sup>\*,2,4</sup>

<sup>1</sup>Univ. Bordeaux, CNRS, Bordeaux INP, ISM, UMR 5255, F-33400 Talence, France

<sup>2</sup>Department of Chemistry, University of Basel, Klingelbergstrasse 80, CH-4056 Basel, Switzerland.

<sup>3</sup>Department of Chemistry, Indian Institute of Technology Hyderabad, Sangareddy, Telangana 502285, India.

<sup>4</sup>Department of Chemistry, Brown University, Providence, RI 02912, USA

#### Figures S1-S3 and Table S1

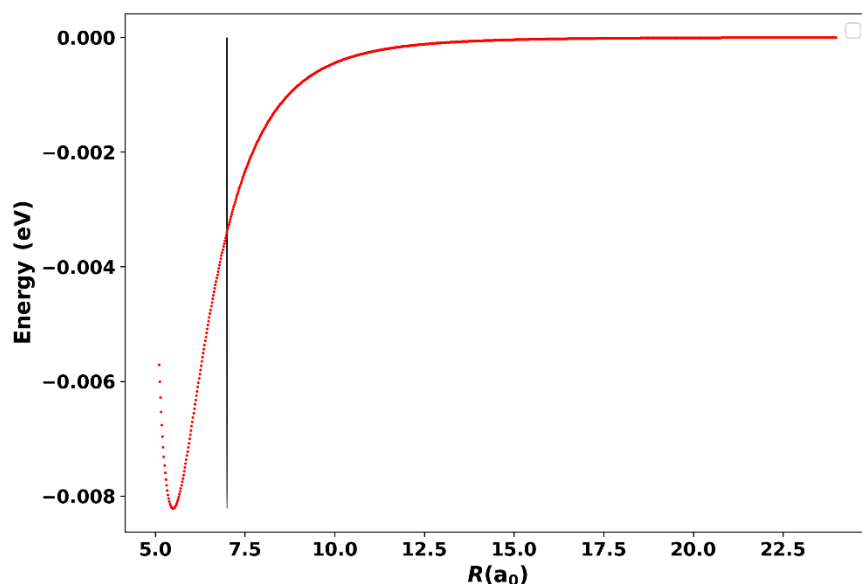

**Figure S1** van der Waals NO + N long-range potential  $V(R)$ . Ratio between  $V(R = 9)/V(R = 7)$  and  $V(R = 12)/V(R = 7)$  are 0.2168 and 0.0380 respectively.

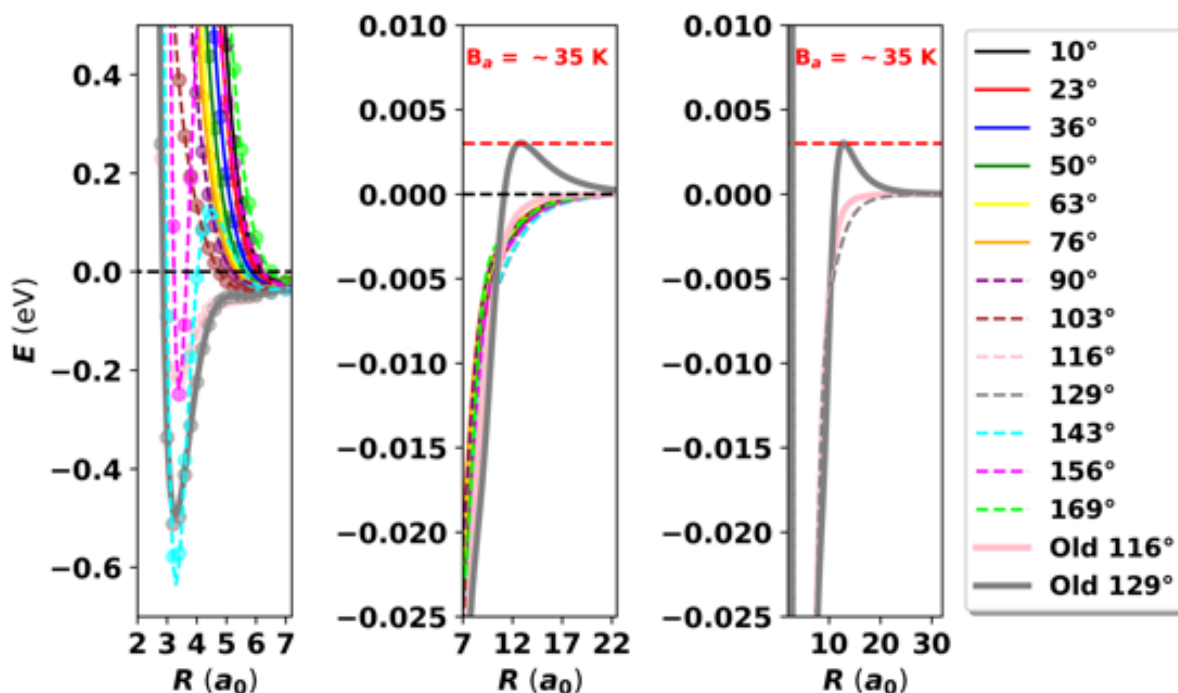

**Figure S2** RKHS evaluation at different angular cuts for short ( $R < 7.0 a_0$ ) and long ( $R \geq 7.0 a_0$ ) ranges. **Top panel:** The evaluations are at fixed  $r = q^- = 2.100 a_0$  (inner turning point), **Middle panel:**  $r = r_{eq} = 2.185 a_0$ , **Bottom Panel:**  $r = q^+ = 2.280 a_0$  (outer turning point). Points represent ab-initio reference (symbols), RKHS evaluation with PES2022-LJ1 (solid/dash lines), and RKHS evaluation with PES2020 (thick solid line) ( $116^\circ$  and  $129^\circ$ ).

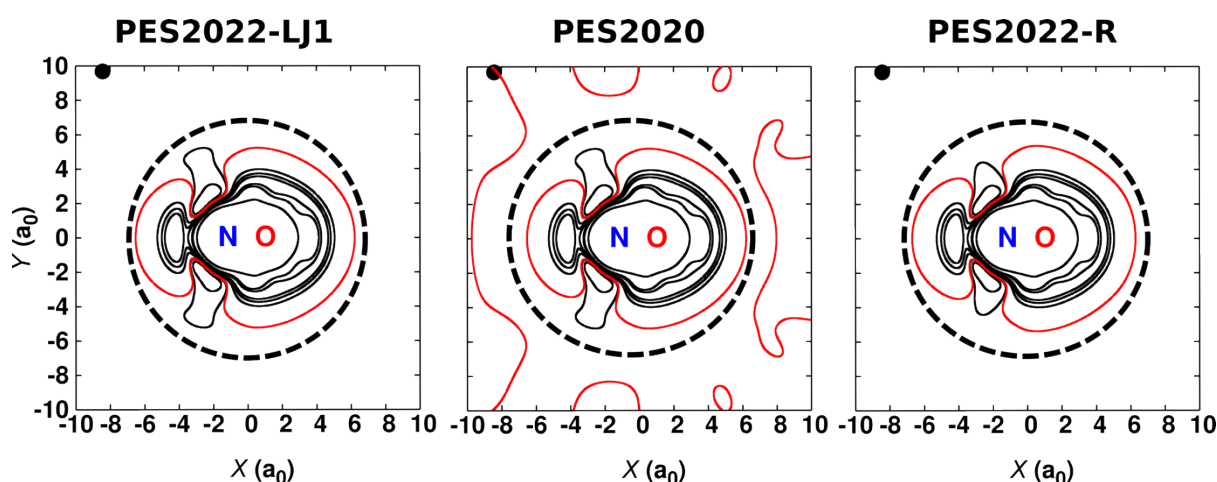

**Figure S3** Contour plots of the RKHS evaluated energy surface at fixed equilibrium N-O separation of  $r = 2.185 a_0$ . **Left panel:** for PES2022-LJ1, **Middle Panel:** PES2020, and **Right Panel:** PES2022-R. Contour lines are shown for energies  $[-0.3, -0.05, 0.45, 0.71, 0.96, 2.0, 2.5, 6.7]$  eV (black solid lines) and energy is reported with respect to dissociation to N + NO ( $r_{eq}$ ).

To highlight the pronounced (unphysical) anisotropy present in PES2020 a selected isocontour at 0.0031 eV= 36 K (red solid line) is drawn to indicate the barrier at  $\theta=129.0^\circ$ ,  $R=12.85 a_0$  in the XY representation  $(-8.43,9.69) a_0$ . The solid black circle indicates a reference geometry to highlight that PES2020 contains an isocontour with positive energy at large separation  $R$  whereas PES2022-LJ1 and PES2022-R do not. The black dashed line is a circle with a radius of  $7.0 a_0$  which contains all the data we have retained from the MRCI+Q calculations.

**Table S1** Experimental and calculated rate coefficients ( $\times 10^{-11} \text{ cm}^3 \text{ s}^{-1}$ ) for the  $\text{N}(^4\text{S}) + \text{NO}(X^2\Pi) \rightarrow \text{O}(^3\text{P}) + \text{N}_2(X^1\Sigma_g^+)$  reaction.

| $T$ (K) | Expt. | PES2020<br>(HB) | PES2022-R<br>(HB) | PES2022-R<br>(GB) | PES2022-<br>LJ1 (HB) | PES2022-<br>LJ2 (HB) |
|---------|-------|-----------------|-------------------|-------------------|----------------------|----------------------|
| 300     |       | 3.33            | 2.95              | 3.13              | 3.73                 | 3.60                 |
| 296     | 2.81  | 3.41            | 2.98              | 2.92              | 3.75                 | 3.62                 |
| 200     |       | 3.92            | 3.71              | 3.82              | 4.78                 | 4.44                 |
| 177     | 3.50  | 4.19            | 3.93              | 4.21              | 5.17                 | 4.75                 |
| 127     | 4.00  | 4.59            | 4.69              | 4.41              | 6.42                 | 5.69                 |
| 100     |       | 4.88            | 5.37              | 5.41              | 7.42                 | 6.35                 |
| 75      | 5.27  | 5.04            | 6.09              | 6.24              | 8.62                 | 7.07                 |
| 50      | 6.64  | 4.83            | 6.80              | 6.54              | 9.97                 | 7.64                 |
| 30      |       | 4.14            | 6.92              | 6.80              | 10.88                | 7.72                 |
